# Supplementary material for: Increased expression of the mitochondrial derived peptide, MOTS-c, in skeletal muscle of healthy aging men is associated with myofiber composition
Source: PubMed Central journal article supplement (PMC7138593; doi:10.18632/aging.102944), 2020-03-17
Supplement: aging-12-102944-s001..pdf [file aging-12-102944-s001..pdf]

SUPPLEMENTARY FIGURES

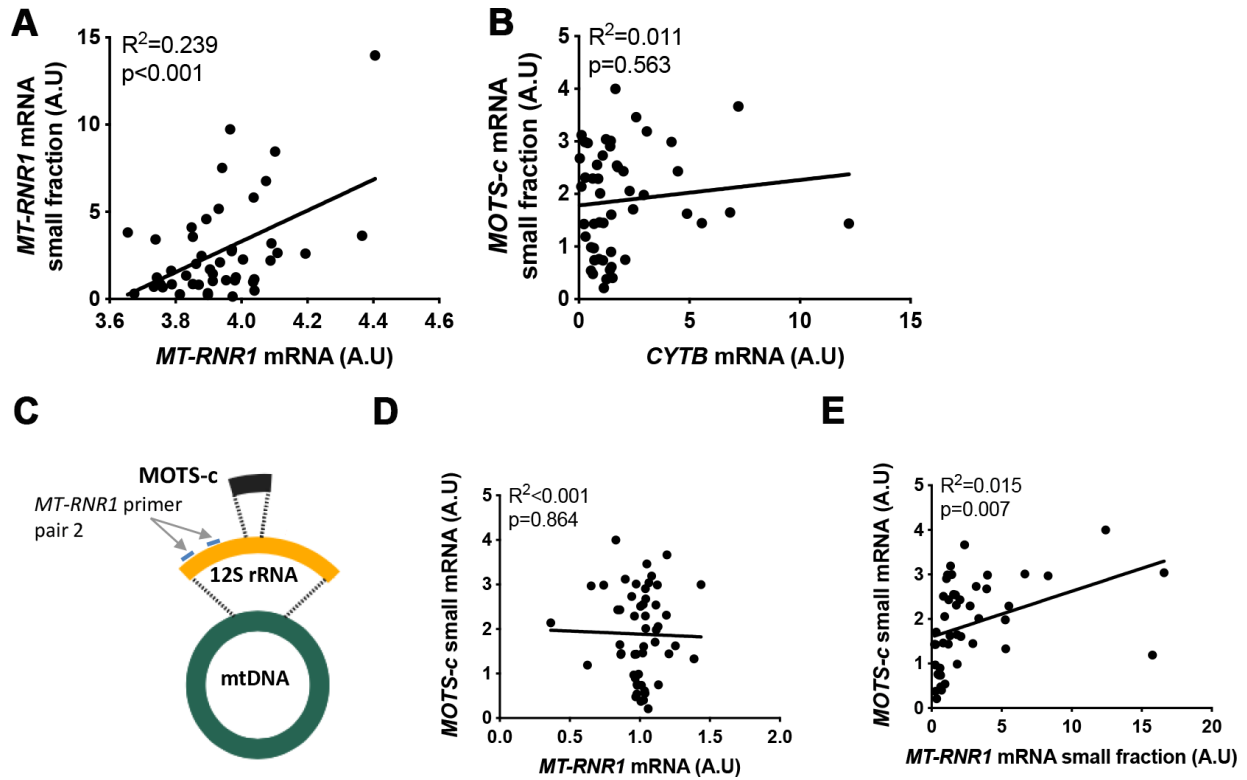

**Supplementary Figure 1. Muscle MOTS-c and 12S rRNA transcription with aging additional data.** Correlation between young, middle-aged and older male muscle 12S rRNA mRNA (*MT-RNR1*) in the total and small mRNA fraction (A) and correlation between *MOTS-c* mRNA and *CYTB* mRNA levels in the total RNA fraction (B). A second primer pair designed against a different region of *MT-RNR1* (C) was used to correlate *MOTS-c* mRNA levels with *MT-RNR1* mRNA levels in the total (D) and small (E) RNA fraction.

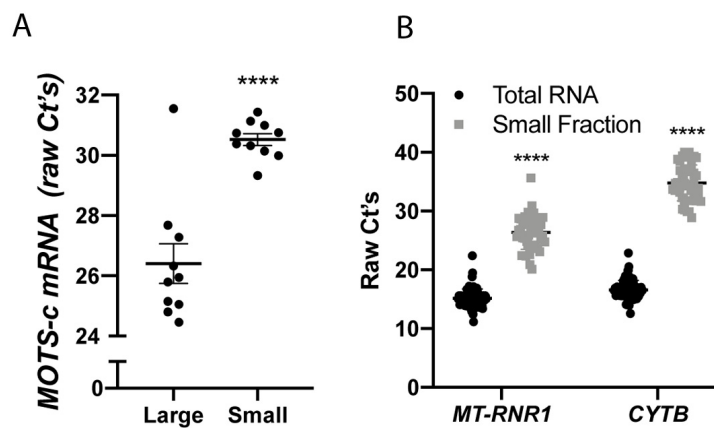

**Supplementary Figure 2. Relative gene expression in small and total muscle RNA fractions.** Cycle threshold (Ct's) for *MOTS-c* mRNA (A) and *MT-RNR1* and *CYTB* (B) in RNA fraction enriched for short (<200 nt; small fraction) transcripts or containing longer transcripts (large and total). \*\*\*\*p<0.0001.
